# Supplementary material for: WITHDRAWN: A Machine Learning Model for Real-Time Hypoglycemia Risk Prediction in Hospitalized Diabetic Patients: Development and Validation
Source: Research Square preprint supplement (doi:10.21203/rs.3.rs-6171081/v1), 2025-03-11
Supplement: Supplementary file 1 [file e40b217959b8561ced61acf1.docx]

| Algorithm | Parameter |
| --- | --- |
| SVM | param_grid = {  'C': [0.1, 1, 10, 50, 100],  'gamma': [0.0001, 0.001, 0.01, 0.1, 1, 10],  'kernel': ['linear', 'rbf', 'poly', 'sigmod' ]  } |
| CatBoost | param_grid = {  ' iterations': [100, 200, 300, 400, 500],  'depth': [4, 5, 6, 7, 8, 9, 10],  'learning_rate': [0.001, 0.01, 0.03, 0.05, 0.1, 0.3, 0.5, 1]  } |
| XGBoost | param_grid = {  'max_depth': [3, 4, 5, 6, 7, 8, 9],  'learning_rate': [0.001, 0.01, 0.03, 0.05, 0.1, 0.3, 0.5, 1, 2],  'n_estimators': [100, 200, 300],  'gamma': [0.1, 0.2, 0.3],  'min_child_weight': [1, 2, 3, 4, 5, 6, 7, 8, 9],  'subsample': [0.7, 0.75, 0.8, 0.85, 0.9],  } |
| RandomForest | param_grid = {  'n_estimators': [100, 200, 300, 400, 500]  } |
| Transformer | param_grid = {  'learning_rate': [0.0001, 0.001, 0.01, 0.1, 1],  'num_train_epochs': [5, 10, 100],  'per_device_train_batch_size': [16, 32, 64],  'warmup_steps': [0, 50, 100, 300, 500],  'weight_decay': [0.001, 0.01, 0.1, 1, 10]  ,  } |
| GBDT | param_grid = {  'n_estimators': [100, 200, 300],  'max_depth': [3, 4, 5, 6, 7, 8],  'learning_rate': [0.001, 0.01, 0.1, 1]  } |
| TabNet | param_grid = {  'n_d': [8, 16, 32, 48],  'n_a': [8, 16, 32, 48],  'n_steps': [3, 4, 5, 6, 7, 8, 9, 10]  } |
| AdaBoost | param_grid = {  'n_estimators': [100, 150, 200, 250, 300],  'learning_rate': [0.001, 0.003, 0.005, 0.01, 0.03, 0.05, 0.1, 0.3, 0.5, 1],  'algorithm': ['SAMME', 'SAMME.R']  } |
| LGBM | param_grid = {  'n_estimators': [100, 200, 300, 400, 500],  'max_depth': [3, 4, 5, 6, 7, 8],  'reg_alpha': [0, 0.1, 0.01],  'reg_lambda': [1, 1.5, 2],  'learning_rate': [0.001, 0.01, 0.1, 1]  )  } |
| DecisionTree | param_grid = {  'max_depth': [2, 3, 4, 5, 6, 7, 8],  'max_features': ['sqrt', 'log2', None]  } |
